# Supplementary material for: A new approach for the preparation of durable and reversible color changing polyester fabrics using thermochromic leuco dye-loaded silica nanocapsules
Source: Royal Society of Chemistry journal article supplement (doi:10.1039/c7tc02077e), 2017-01-01
Supplement: c7tc02077e1.pdf [file c7tc02077e1.pdf]

## Supplementary Information for:

# A new approach for the preparation of durable and reversible color changing polyester fabrics using thermochromic leuco dye- loaded silica nanocapsules

Wan Zhang, Xiaoqian Ji, Chanjuan Zeng, Kunlin Chen, Yunjie Yin, Chaoxia Wang\*

*Key Laboratory of Eco-Textile, Ministry of Education, School of Textiles and Clothing, Jiangnan University, Wuxi 214122, China.*

*\*Email: wangchaoxia@sohu.com*

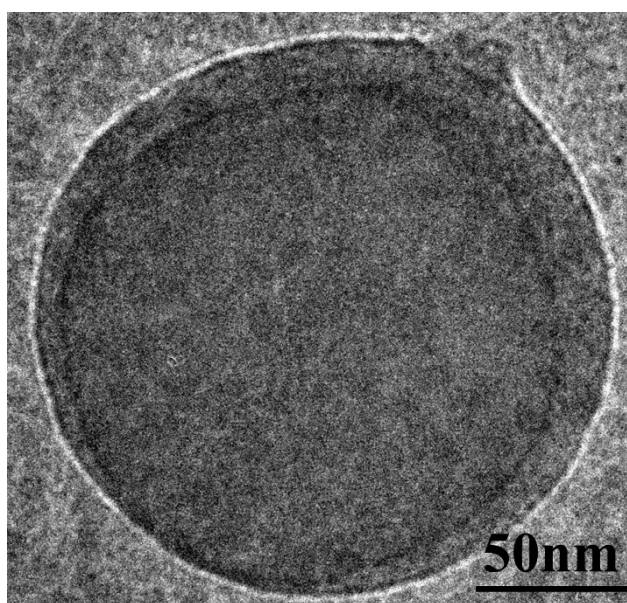

**Fig. S1** TEM of TLD@SiO<sub>2</sub>

To further investigate the structure of the TLD@SiO<sub>2</sub>, a larger size TLD@SiO<sub>2</sub> was prepared using mechanical stirring to emulsify TLD instead of ultrasonic for observing the structure of the TLD@SiO<sub>2</sub> easily. In Fig. S1, a clear capsule structure presented with particle size about 180 nm.

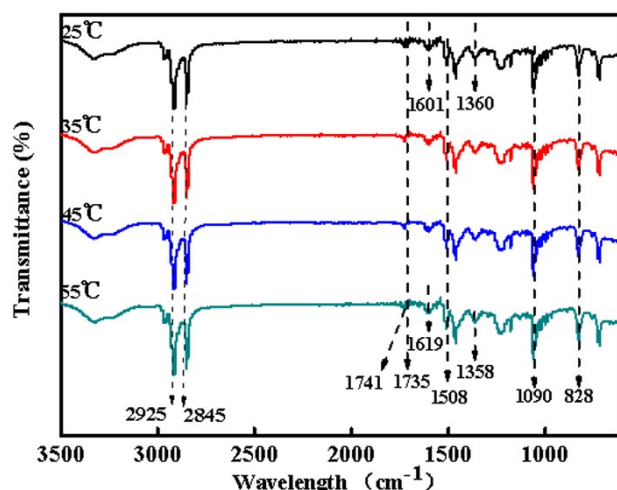

Fig. S2 FT-IR spectra of TLD@SiO<sub>2</sub> in the range of 25°C to 55°C.

The FT-IR spectra of TLD@SiO<sub>2</sub> were recorded in the range of 25°C to 55°C as a control set of thermochromic polyester fabric, as shown in Fig. S2. The change tendency of the FT-IR spectra from 25°C to 55°C was in accordance with that of thermochromic polyester fabric, suggesting that the TLD@SiO<sub>2</sub> on the fabric was not influenced, and still followed the thermochromic principle. The obvious peaks of 1090 cm<sup>-1</sup> and 828 cm<sup>-1</sup> were ascribed to the Si-O-Si stretching vibrations.

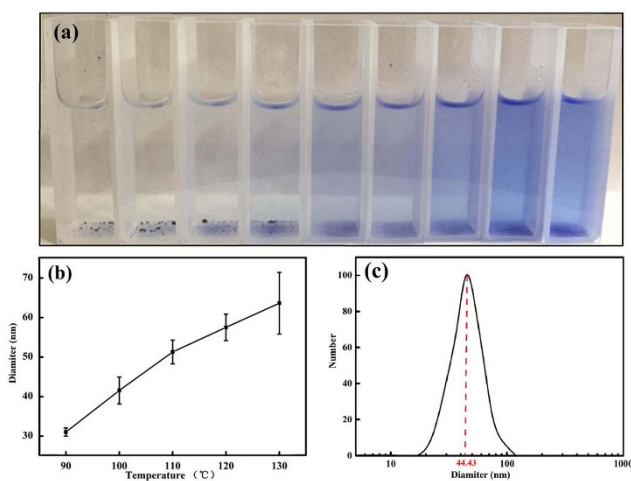

Fig. S3 (a) the dispersities of TLD@SiO<sub>2</sub> in water of various dyeing temperature: from left to right was of 50°C, 60°C, 70°C, 80°C, 90°C, 100°C, 110°C, 120°C and 130°C respectively; (b) the particle size of TLD@SiO<sub>2</sub> in water at various temperatures; (c) the particle size of TLD@SiO<sub>2</sub> in water after treating the polyester fabrics at 130°C for 60 min.

Dye liquors were prepared with 0.12 g TLD@SiO<sub>2</sub>, 20 mL deionized water, and pH was adjusted to 6 with HCl (0.1 mol/L). The temperatures of the dye liquors were raised from 30°C to 100°C at a rate of 2°C/min, and then raised to 130°C at a rate of 1°C/min. When the temperature reached to 50°C, 60°C, 70°C, 80°C, 90°C, 100°C, 110°C, 120°C and 130°C, respectively, one of the dye liquors were taken out during the dyeing process, and then they were

photographed at 20°C to compare the concentrations of hydrated TLD@SiO<sub>2</sub> in water.

It can be seen that TLD@SiO<sub>2</sub> was insoluble in water, and deposited at the bottom of cuvette at the temperature lower than 80°C, but dispersed uniformly in water when the temperature reached or surpassed 90°C (Fig. S3a). The hydrated particle size of TLD@SiO<sub>2</sub> in water also increased with the rise of temperature (Fig. S3b). The hydrated particle size of TLD@SiO<sub>2</sub> was 44 nm after dyeing (Fig. S3c), which was in accordance with the results shown in Fig. 3c. The results indicated that heating can increase the hydration of the TLD@SiO<sub>2</sub> while dyeing, making it produce more hydrophilic hydroxyl group and disperse uniformly in water to dye the polyester fabrics via hydrogen bonds and covalent bonds. All these results indicated that the particle morphology of TLD@SiO<sub>2</sub> can be kept even when it was used to dye at the temperature of 130°C, and TLD@SiO<sub>2</sub> was easy to be hydrated.
